# Supplementary material for: A small molecule compound IMB-LA inhibits HIV-1 infection by preventing viral Vpu from antagonizing the host restriction factor BST-2
Source: PubMed Central journal article supplement (PMC4680884; doi:10.1038/srep18499), 2015-12-16

## **A small molecule compound IMB-LA inhibits HIV-1 infection by preventing viral Vpu from antagonizing the host restriction factor BST-2**

Zeyun Mi<sup>1,5\*</sup>, Jiwei Ding<sup>1\*</sup>, Quan Zhang<sup>1\*</sup>, Jianyuan Zhao<sup>2</sup>, Ling Ma<sup>1</sup>, Haisheng Yu<sup>6</sup>, Zhenlong Liu<sup>3</sup>, Guangzhi Shan<sup>1</sup>, Xiaoyu Li<sup>1</sup>, Jinming Zhou<sup>1</sup>, Tao Wei<sup>2</sup>, Liguang Zhang<sup>6</sup>, Fei Guo<sup>4</sup>, Chen Liang<sup>3§</sup>, Shan Cen<sup>1§</sup>

<sup>1</sup> Institute of Medicinal Biotechnology, Chinese Academy of Medical Sciences and Peking Union Medical School, Beijing 100050, China;

<sup>2</sup> Beijing Union University, Beijing 100101, China

<sup>3</sup> Lady Davis Institute-Jewish General Hospital, McGill University, Montreal, Quebec, Canada;

<sup>4</sup> Institute of Pathogen Biology, Chinese Academy of Medical Science, Beijing, China.

<sup>5</sup> Department of Biochemistry and Molecular Biology, Tianjin Medical University, Tianjin, China

<sup>6</sup>Institute of Biophysics, Chinese Academy of Sciences, Beijing, China

\*These authors contributed equally to this work

<sup>§</sup> Corresponding author: Shan Cen, Tel: 86-10-63037279; Fax: 86-10-63037279; E-mail:

shancen@imb.pumc.edu.cn; or Chen Liang, Tel: 1-514-3408260; Fax: 1-514-3407537; E-mail:

chen.liang@mcgill.ca

Running title: A compound inhibits Vif-mediated degradation of BST-2.

Key words: HIV-1, BST-2, Vpu, Tetherine, small molecule compound

**Fig 1D**

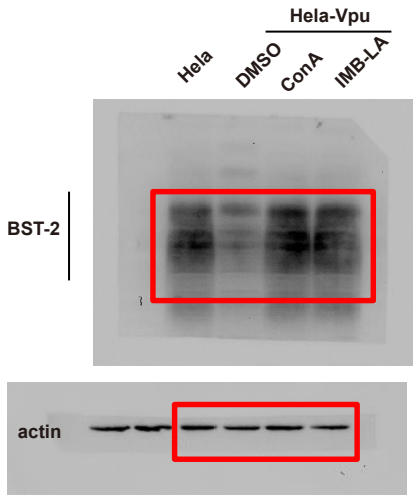

**Fig 2B**

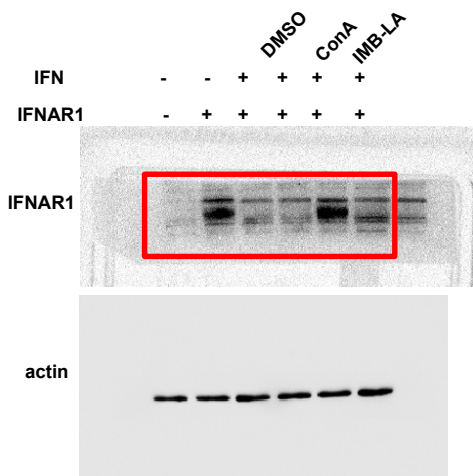

**Fig 3B**

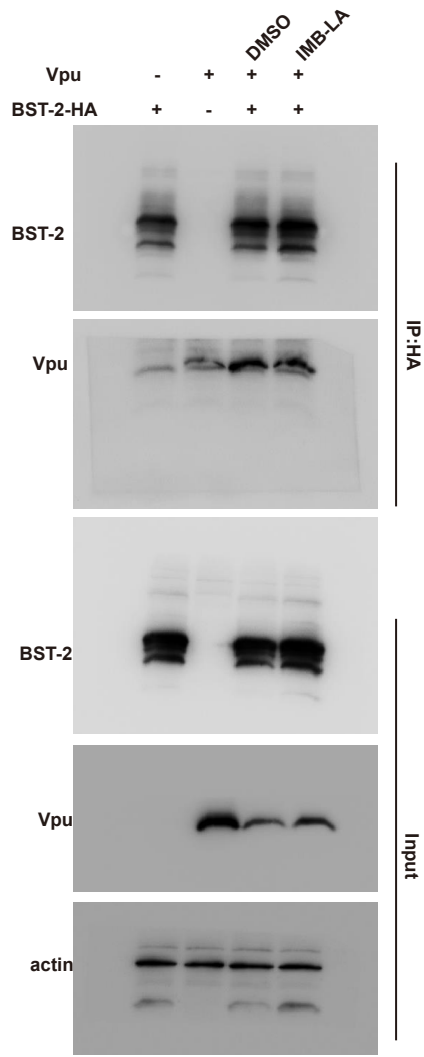

**Fig 3D**

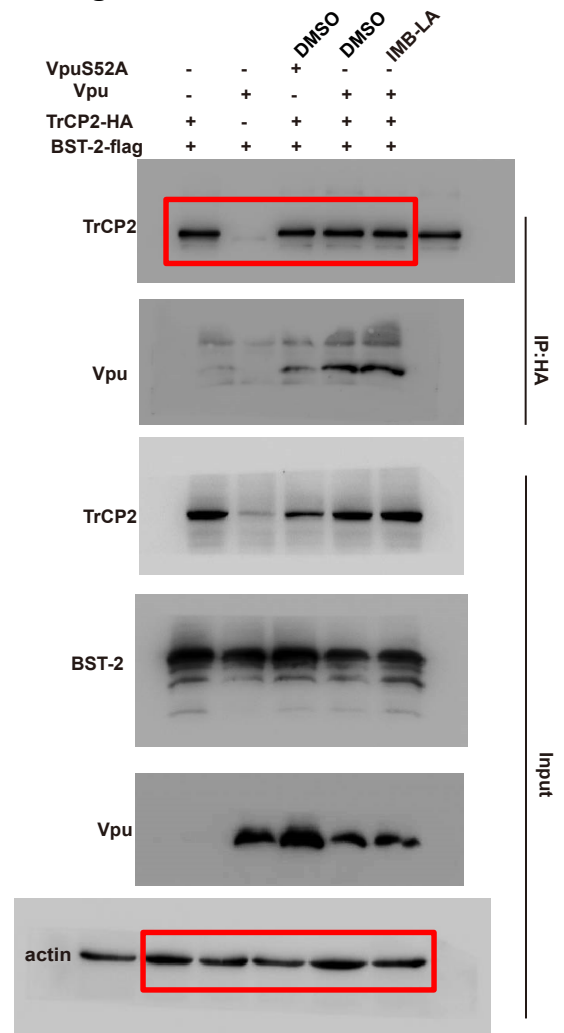

**Fig 4**

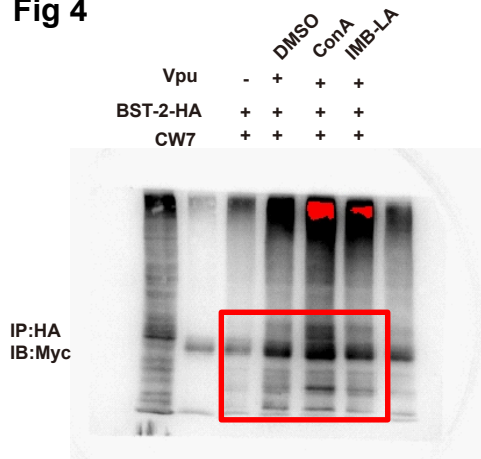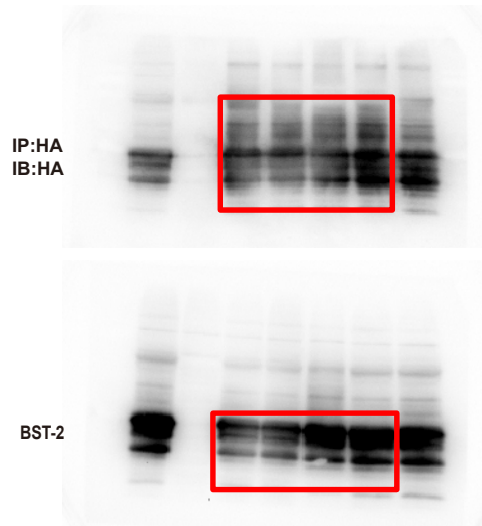

**Fig 6A**

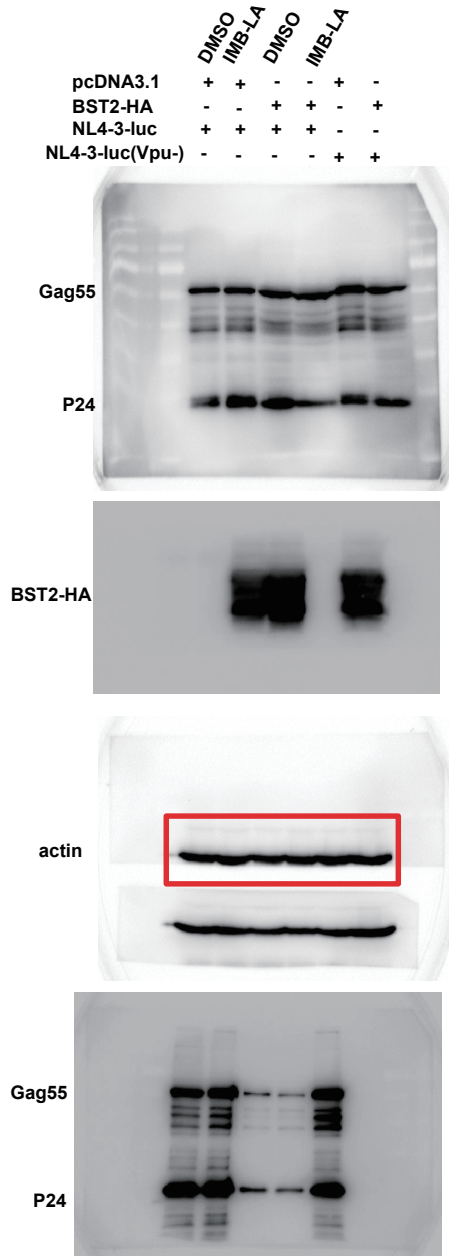

**Fig 6B**

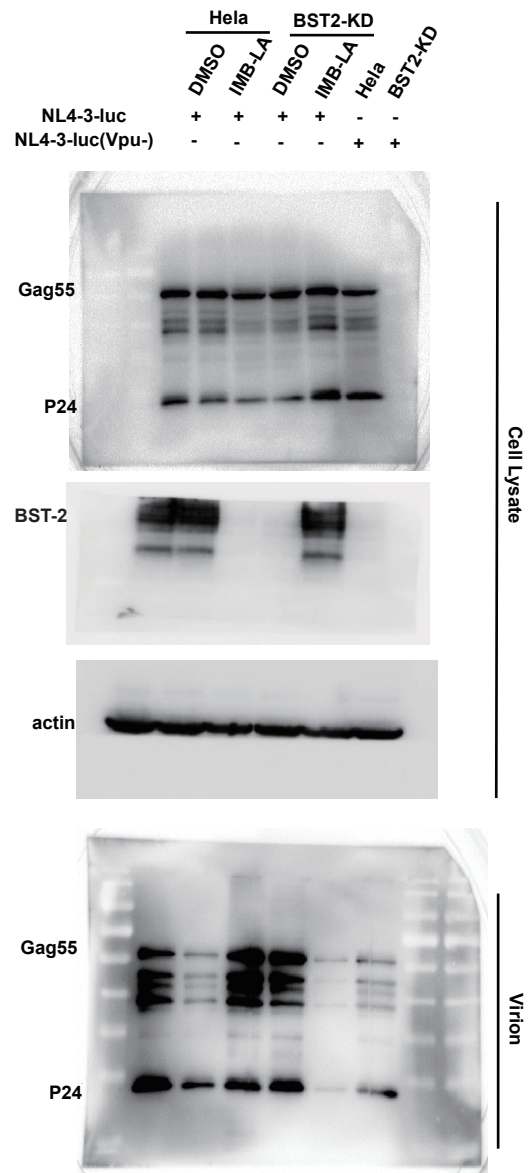

FIG 6G

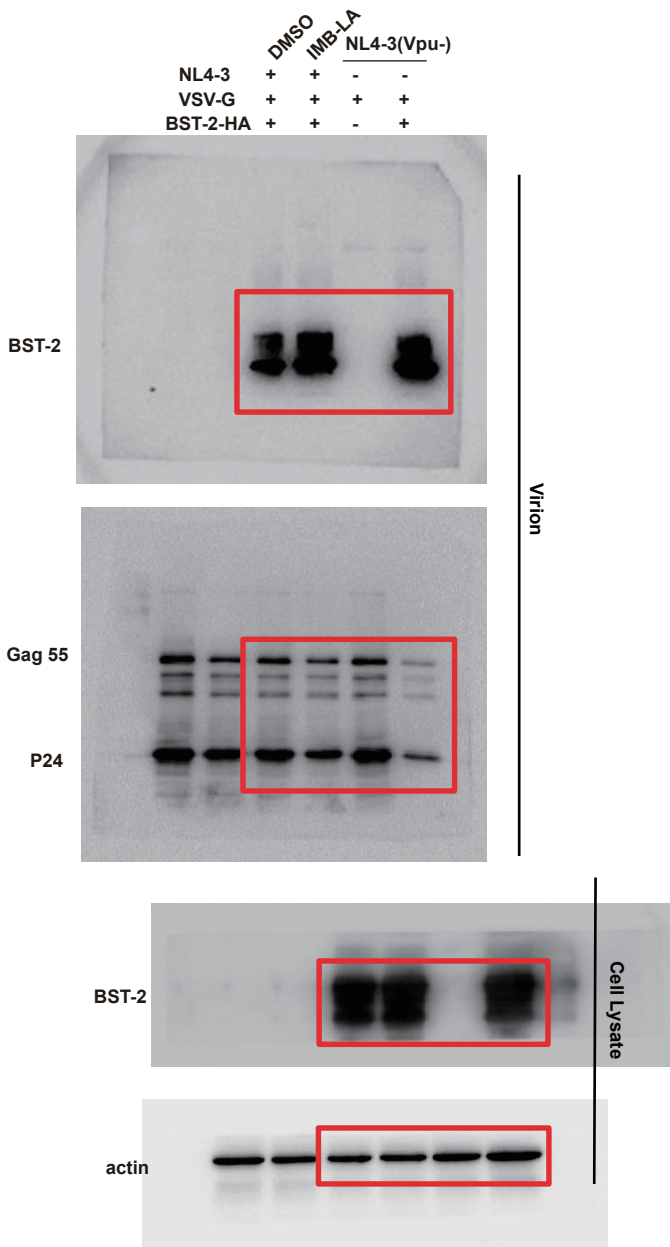

Supplement: srep18499-s1.pdf [file srep18499-s1.pdf]
